# Supplementary material for: Exercise Training Promotes Cardiac Hydrogen Sulfide Biosynthesis and Mitigates Pyroptosis to Prevent High-Fat Diet-Induced Diabetic Cardiomyopathy
Source: PubMed Central journal article supplement (PMC6943713; doi:10.3390/antiox8120638), 2019-12-11
Supplement: antioxidants-08-00638-s001.pdf [file antioxidants-08-00638-s001.pdf]

## **Supplementary File**

### **Exercise promotes cardiac hydrogen sulfide biosynthesis and mitigates pyroptosis to prevent high-fat diet induced diabetic cardiomyopathy**

Sumit Kar<sup>1\*</sup>, Hamid R. Shahshahan<sup>1\*</sup>, Bryan T. Hackfort<sup>1\*</sup>, Santosh K. Yadav<sup>1</sup>, Roopali Yadav<sup>1</sup>, Tyler N. Kambis<sup>1</sup>, David J. Lefer<sup>2</sup>, Paras K. Mishra<sup>1</sup>

Affiliations:

<sup>1</sup>Department of Cellular and Integrative Physiology, University of Nebraska Medical Center, Omaha, NE, USA

<sup>2</sup>Cardiovascular Center of Excellence, Louisiana State University Health Sciences Center, New Orleans, LA 70112

#### **Corresponding author:**

Paras Kumar Mishra, Ph.D., F.A.H.A. F.C.V.S.  
Department of Cellular and Integrative Physiology  
University of Nebraska Medical Center  
Omaha, NE-68198, USA  
Phone: 402-559-8524  
Fax: 402-559-4438  
Email: [paraskumar.mishra@unmc.edu](mailto:paraskumar.mishra@unmc.edu)

\*Authors contributed equally

**Table S1.** Exercise training protocol: Regimen for the exercise pre-training and training.

---

| Exercise regimen | <u>Warm-up</u> |         | <u>Run</u> |         | <u>Cool-down</u> |         |
|------------------|----------------|---------|------------|---------|------------------|---------|
|                  | Time           | Speed   | Time       | Speed   | Time             | Speed   |
|                  | (min)          | (M/min) | (min)      | (M/min) | (min)            | (M/min) |
| Pre-training     | 5              | 8       | 5, 20,     | 10, 10  | 5                | 8       |
| 1-4 days         |                |         | 30, 40     | 12, 12  | 5                | 8       |
| Week 1           | 5              | 8       | 50         | 12      | 5                | 8       |
| Week 2-20        | 5              | 8       | 50         | 15      | 5                | 8       |

---

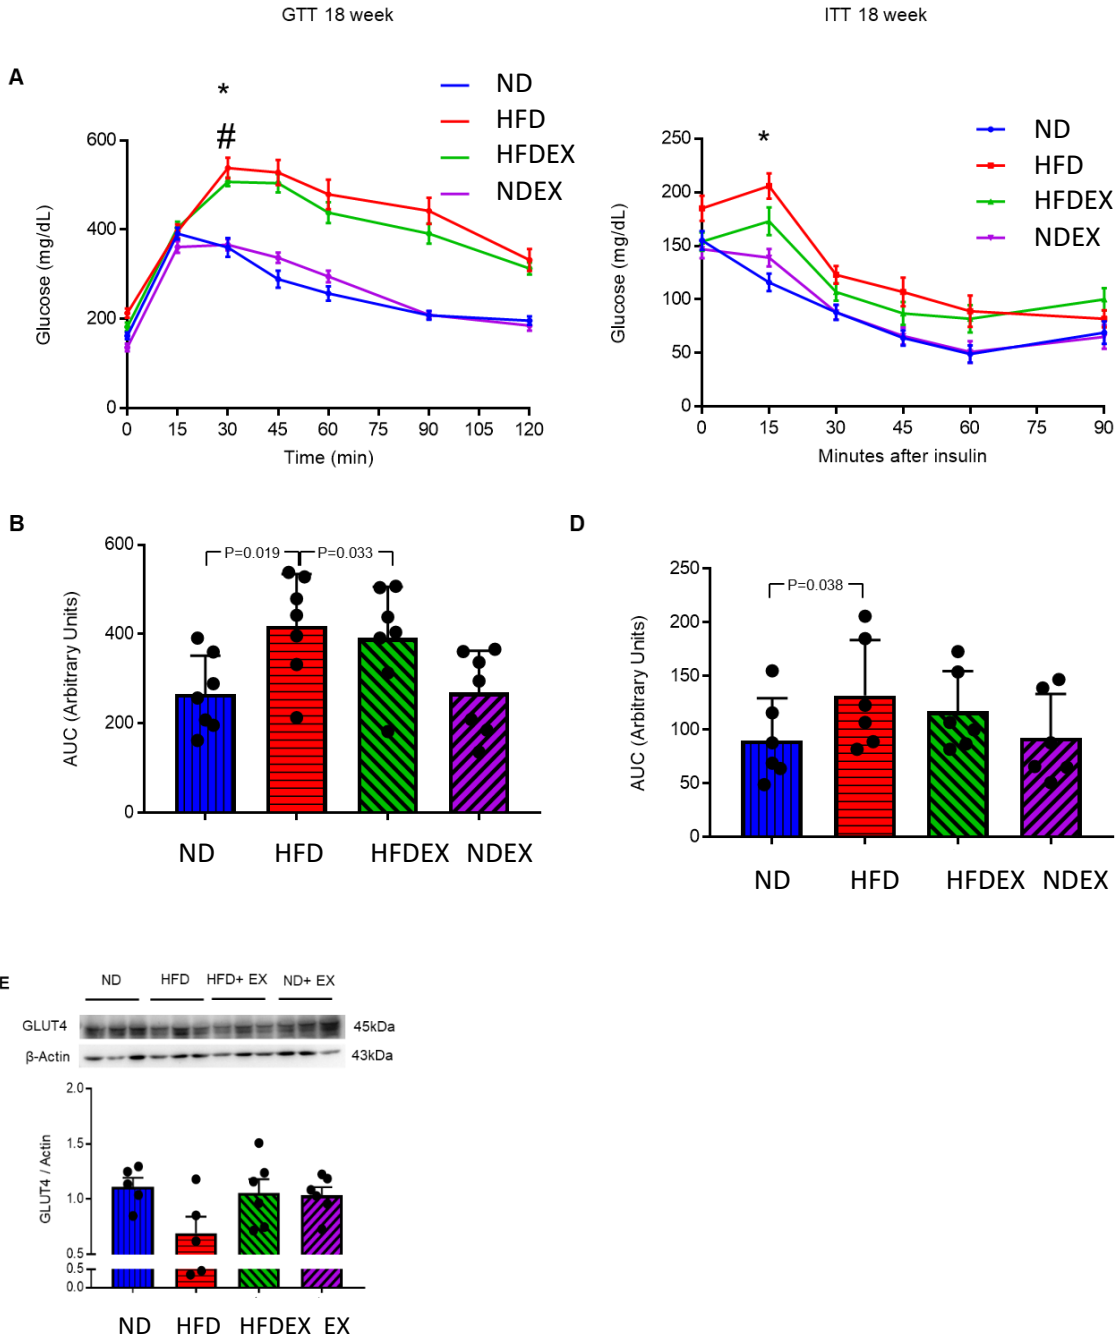

**Figure S1. 18 weeks treatment of high-fat diet induces a diabetic phenotype in mice. A, B.** Intraperitoneal glucose tolerance test (GTT) at 18-week treatment in the four groups of mice: normal diet (ND), high-fat diet (HFD), HFD mice on exercise training (HFDEX) and ND mice on exercise training (NDEX). Glucose clearance was decreased in HFD but improved with EX. **C, D.** Intraperitoneal insulin tolerance test (ITT) at 18-week treatment. Insulin resistance was higher in HFD as compared to ND group which was also improved with EX. **E.** Glucose transporter type 4 (GLUT-4) expression in the heart was slight reduced with HFD treatment but not statistically significant. \*,  $P < 0.05$  between ND and HFD. #,  $P < 0.05$  between HFDEX and HFD. All values expressed as mean  $\pm$  SEM with dots representing each animal. Repeated measures one-way ANOVA and Tukey's post-hoc test was used for statistical analysis.

**A**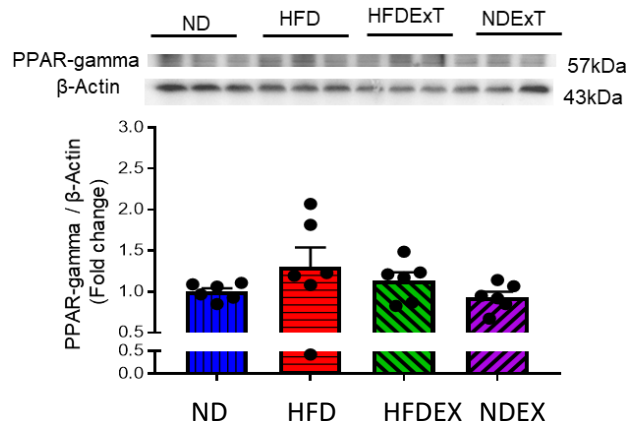**B**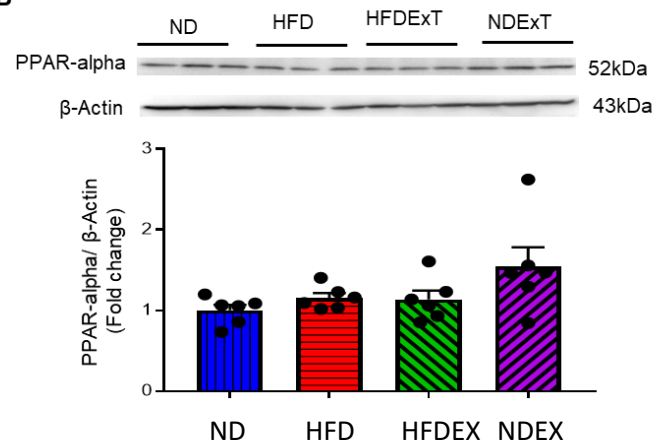

**Figure S2. Exercise training did not alter lipid metabolism regulator PPAR expression.** PPAR $\alpha$  and PPAR $\gamma$  expression were unaltered by HFD or EX. All values expressed as mean $\pm$ SEM with dots representing each animal. Repeated measures one-way ANOVA and Tukey's post-hoc test was used for statistical analysis.

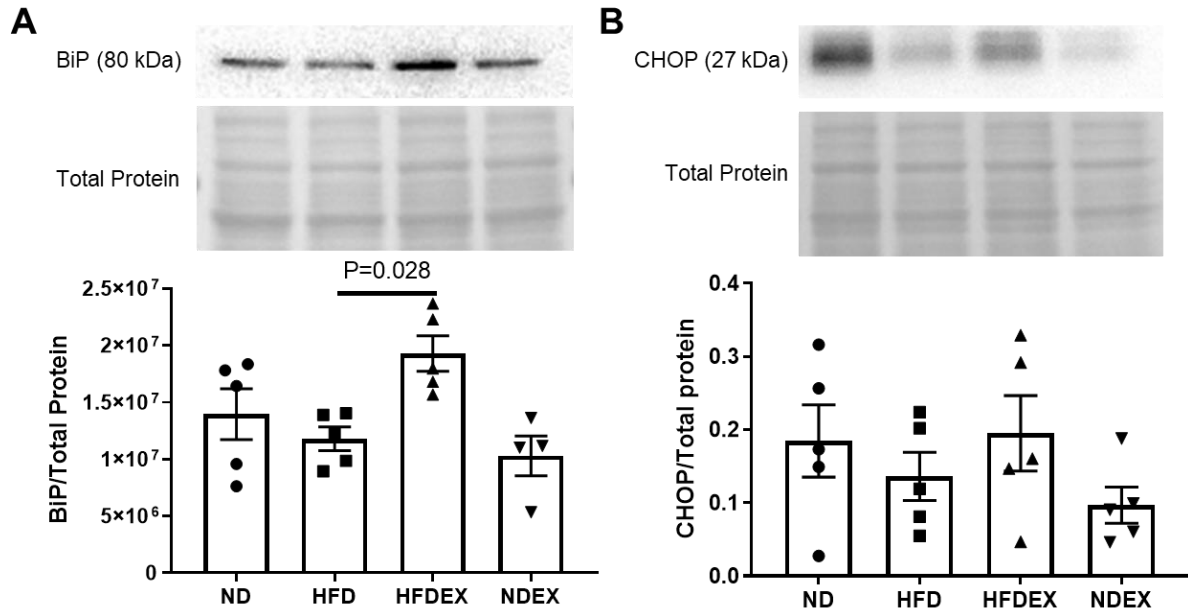

**Figure S3. Expression of endoplasmic reticulum stress markers BiP and CHOP in obese mice with exercise training.** All values expressed as mean±SEM with dots representing each animal. One-way ANOVA and Tukey's post-hoc test was used for statistical analysis.
